# Supplementary material for: A Ratiometric Fluorescent Probe for pH Measurement over a Wide Range Composed of Three Types of Fluorophores Assembled on a DNA Scaffold
Source: MDPI journal article supplement (doi:10.3390/chemistry5030125), 2023-08-17
Supplement: s1 [file s1]

## **-SUPPORTING INFORMATION-**

### **A ratiometric fluorescent probe for pH measurement over a wide range composed of three types of fluorophores assembled on a DNA scaffold**

Eiji Nakata, Khongorzul Gerelbaatar, Mashal Asif, Hiroaki Konishi, Yuya Shibano, Peng Lin, and Takashi Morii \*

Institute of Advanced Energy, Kyoto University, Uji, Kyoto 611-0011, Japan.

\*To whom correspondence should be addressed:

Prof. Takashi Morii

Tel.: +81 774-38-3515

Fax: +81 774-38-3516

E-mail: [t-morii@iae.kyoto-u.ac.jp](mailto:t-morii@iae.kyoto-u.ac.jp)

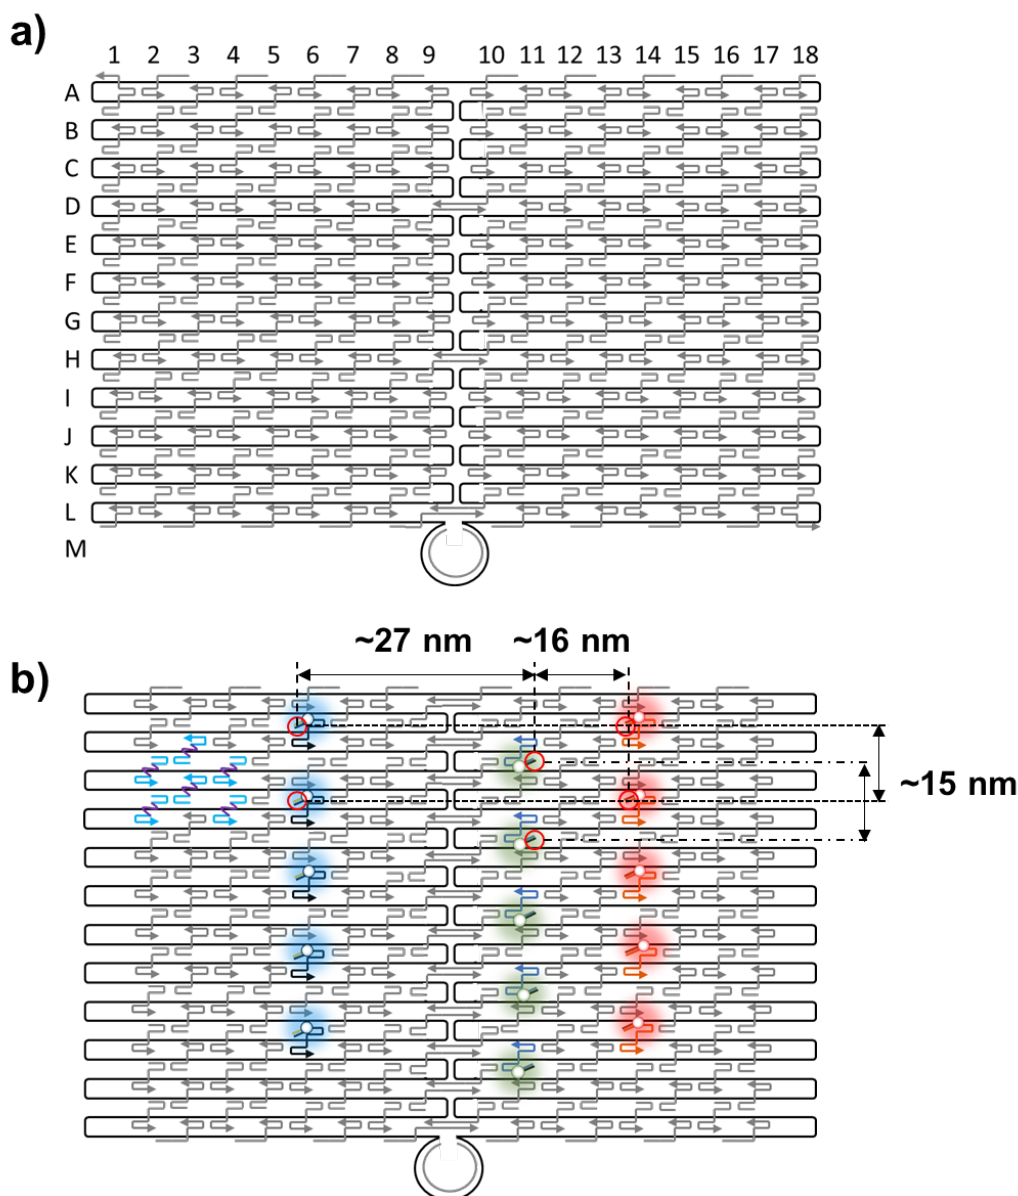

**Figure S1** Design of a DNA origami scaffold (rec-Ori). a) An illustration of the original design of rec-Ori [S1]. The ssDNA scaffold (M13mp18 ssDNA) and staple strands were shown in black lines and gray lines, respectively. b) An illustration of rec-CF5/OG5/CR5 shows the calculated distance between each loading position. The staple strands for both short sides (1A-1L and 18A-18L, 24 staple strands in total) in the original design (Figure S1a) were removed to prevent the intermolecular interaction between the folded rec-Ori. The staple strands of the middle position (9A-9L and 10A-10L, 24 staple strands in total) were hybridized with each other to increase the stability of rec-Ori. The position to load each fluorophore was at least 15 nm away from the loading position of the neighboring fluorophore.

**a) OG-AE**

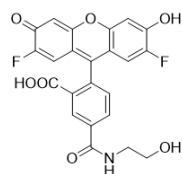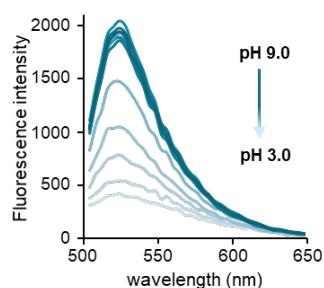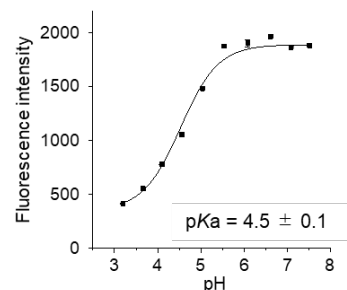

**b) OG-ODN3**

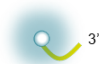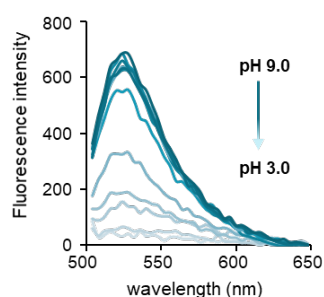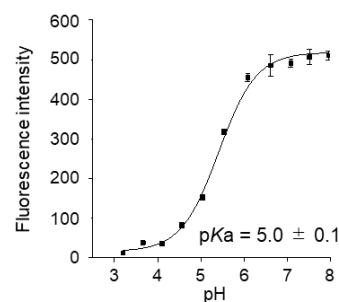

**c) OG-dODN3**

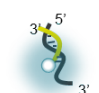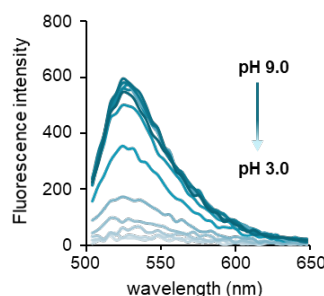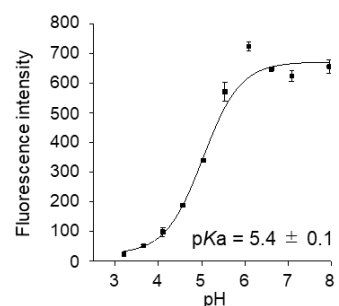

**Figure S2** Fluorescence spectral changes of OG derivatives as the function of pH. a) OG-AE (2-aminoethanol) at different pH (3.2, 3.7, 4.1, 4.6, 5.1, 5.6, 6.1, 6.6, 7.1, 7.5) b) OG modified with a single-stranded DNA (OG-ODN3) at different pH (3.2, 3.7, 4.1, 4.6, 5.1, 5.6, 6.1, 6.6, 7.1, 7.5, 8.0). c) OG-ODN3 hybridized with comp-ODN3 (OG-dODN3) at different pH (3.2, 3.7, 4.1, 4.6, 5.1, 5.6, 6.1, 6.6, 7.1, 8.0). The details of the buffer used for each pH condition were shown in Materials and Methods.

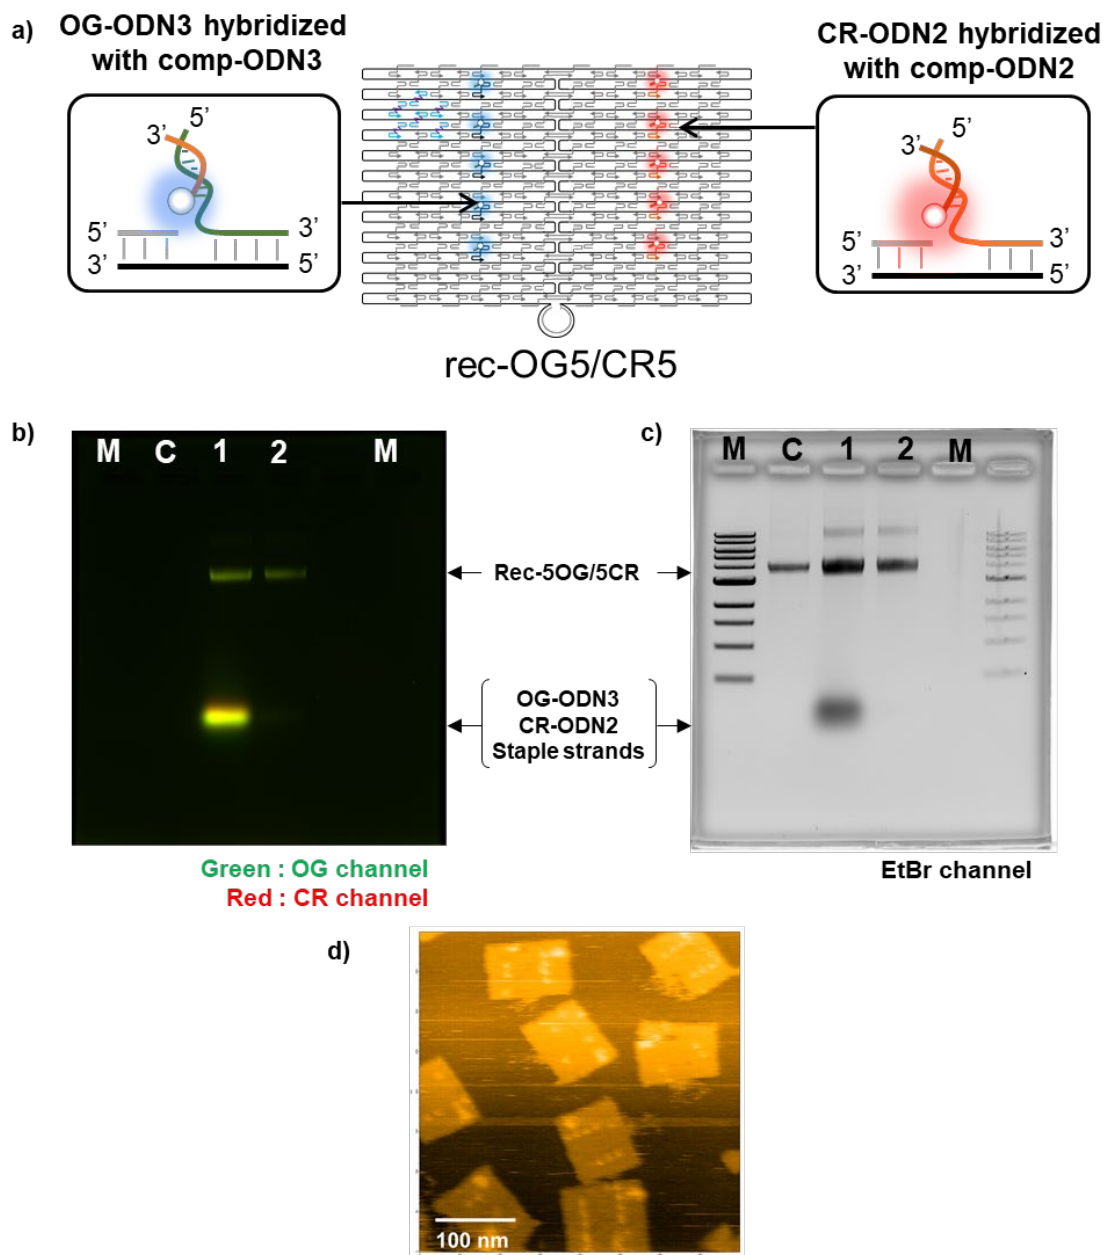

**Figure S3** Characterization of rec-OG5/CR5 by gel electrophoresis and AFM imaging. a) Design of rec-OG5/CR5. b-c) Images for gel electrophoresis analysis of rec-OG5/CR5. b) Visualized by the emission of OG (green) and CR (red). c) Visualized by ethidium bromide (EtBr) staining. Lane M: 1 kbp DNA ladder as marker; Lane C: M13mp18; Lane 1: Rec-OG5/CR5 before purification; Lane 2: Rec-OG5/CR5 after purification. d) AFM image of rec-OG5/CR5.

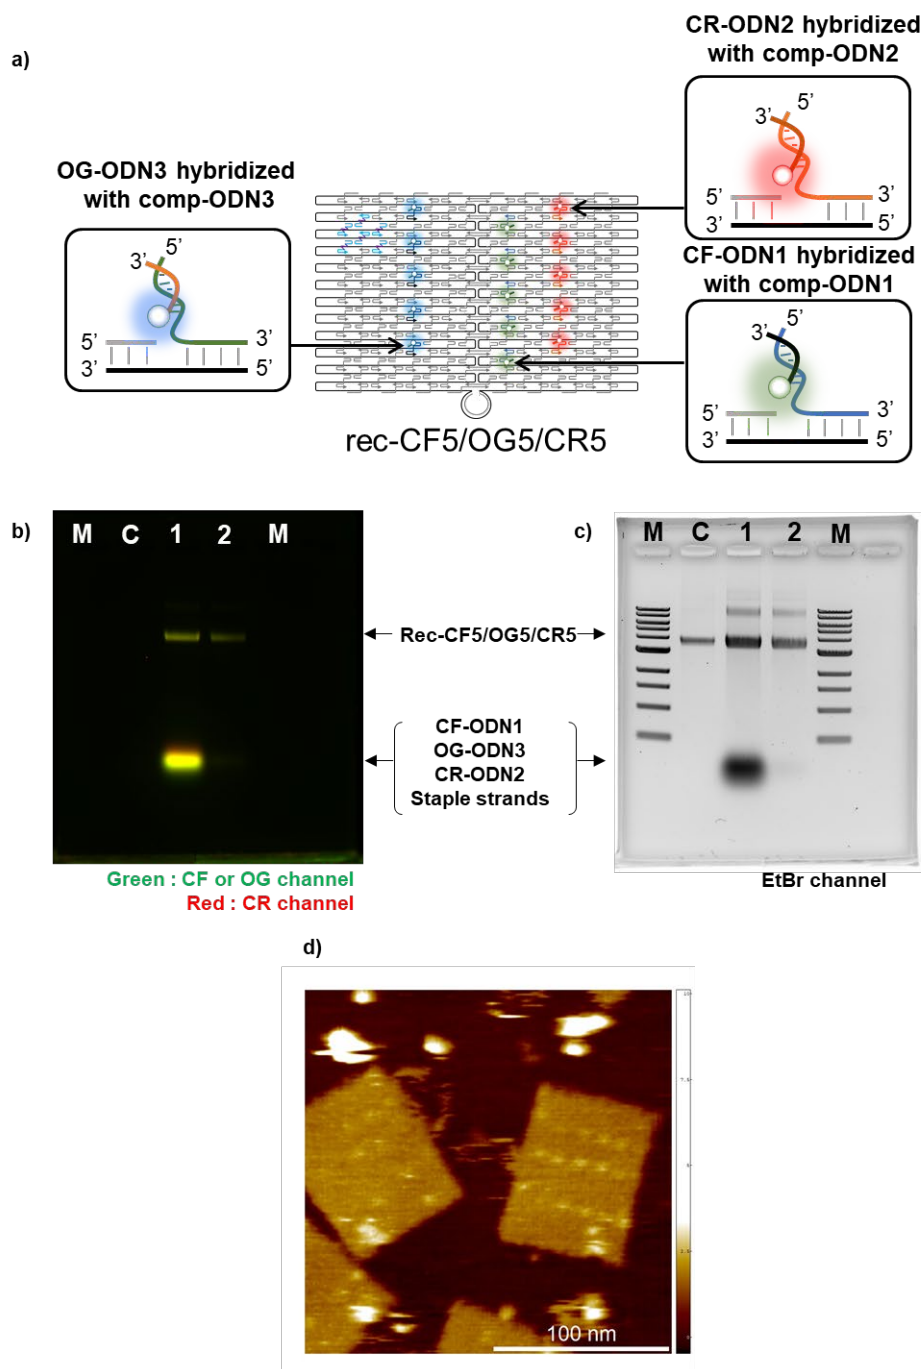

**Figure S4** Characterization of rec-CF5/OG5/CR5 by gel electrophoresis and AFM imaging. a) Design of rec-CF5/OG5/CR5. b-c) Images for gel electrophoresis analysis of rec-CF5/OG5/CR5. b) Visualized by the emission of CF and OG (green), and CR (red). c) Visualized by ethidium bromide (EtBr) staining. Lane M: 1 kbp DNA ladder as marker; Lane C: M13mp18; Lane 1: Rec-CF5/OG5/CR5 before purification; Lane 2: Rec-CF5/OG5/CR5 after purification. d) AFM image of rec-CF5/OG5/CR5.

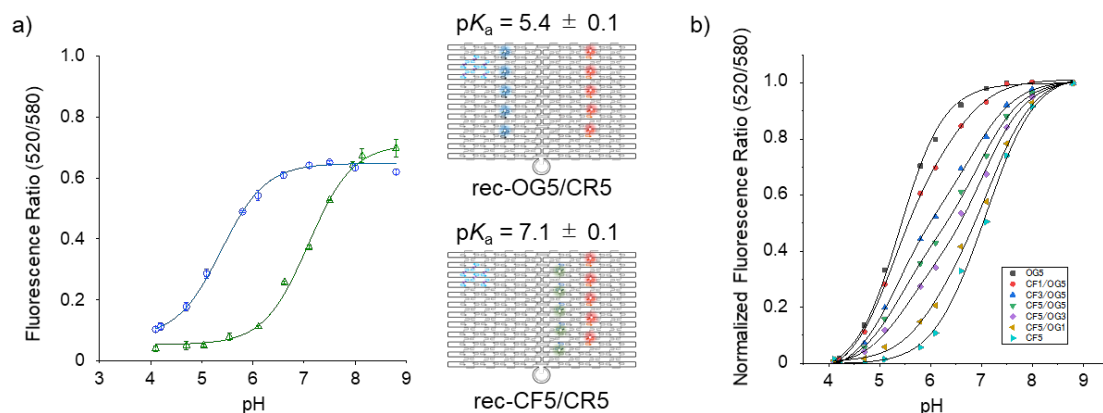

**Figure S5** Estimation of the ratio of fluorescence emission intensities of CF, OG, and CR assembled on rec-Ori with different numbers of CF and OG. a) The plot of the ratio of fluorescence emission intensity of OG or CF to CR of rec-OG5/CR5 or rec-CF5/CR5 at different pH values ranging from 4 to 9 (4.1, 4.2, 4.7, 5.1, 5.8, 6.1, 6.6, 7.1, 7.5, 8.0, and 8.8). b) The simulation plots of the normalized fluorescence emission ratio of rec-CF1/OG5/CR5 (CF1/OG5), rec-CF3/OG5/CR5 (CF3/OG5), rec-CF5/OG5/CR5 (CF5/OG5), rec-CF5/OG3/CR5 (CF5/OG3), and rec-CF5/OG1/CR5 (CF5/OG1) based on the actual ratio data of rec-CF5/CR5 (CF5) and rec-OG5/CR5 (OG5) at different pH values ranging from 4 to 9 (4.1, 4.2, 4.7, 5.1, 5.8, 6.1, 6.6, 7.1, 7.5, 8.0, and 8.8).

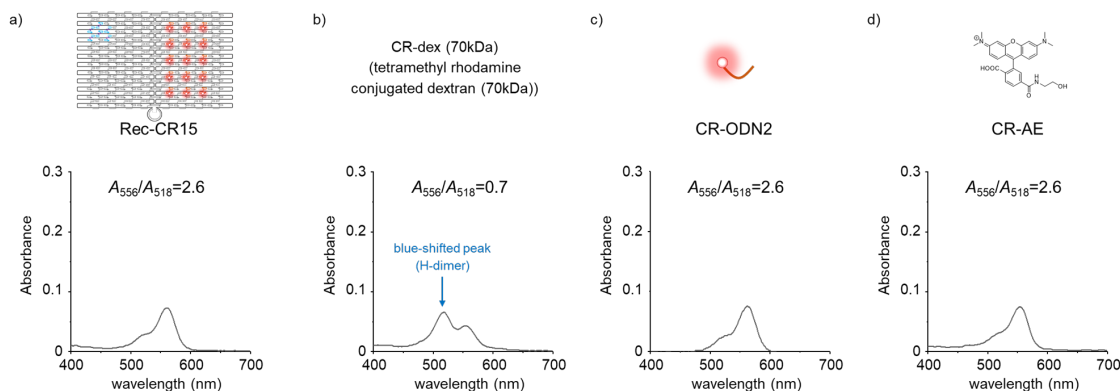

**Figure S6** Absorbance spectra of tetramethylrhodamine (CR) modified scaffold (rec-CR15 or CR-dex (70kDa)) and monomeric CR (CR-ODN and CR-AE) in 40 mM MES buffer (pH7.0). a) rec-CR15 (0.8  $\mu$ M), b) CR-dex (70kDa) (0.5  $\mu$ M), c) CR-ODN (0.7  $\mu$ M), and d) CR-AE (0.8  $\mu$ M).

Note: As shown in Figure S6(b), a blue-shifted peak at 518 nm, indicating H-dimer of CR [S2-S4]. To demonstrate the existence of H-dimer, the ratio of absorbance at 556 nm ( $\lambda_{\text{max}}$  of CR) and 518 nm ( $\lambda_{\text{max}}$  of H-dimer) ( $A_{556}/A_{518}$ ) was compared. CR-dex (70kDa) showed a lower value ( $A_{556}/A_{518} = 0.7$ ) than monomeric CR (CR-ODN2 and CR-AE:  $A_{556}/A_{518} = 2.6$ ). The result indicated that a portion of approximately 8 molecules of CR on 70kDa dextran formed H-dimer, resulting in the appearance of the blue-shifted peak, which is known to cause fluorescence quenching. On the other hand, rec-CR15 had a similar value ( $A_{556}/A_{518} = 2.6$ ) with CR-ODN2 and CR-AE. The result strongly indicated that 15 molecules of CR were assembled on the DNA scaffold without interference between them.

**Table S1** Nucleotide sequences for the staple strands

|        | Position<br>(see Fig.S1a) | Sequence (from 5' to 3')                                                    |
|--------|---------------------------|-----------------------------------------------------------------------------|
| rec-1  | 2A                        | ACGTTAGTAAATGAATTTTCTGTAAGCGGAGT                                            |
| rec-2  | 2B                        | GAGAATAGCTTTTGCGGGATCGTCGGGTAGCA                                            |
| rec-3  | 2C-I-1                    | ACGGCTACTTACTTAG <b><u>TCCTCTTTTGAGGAACAAGTTTCTTGT</u></b> CCGGAACGCTGACCAA |
| rec-4  | 2D-I-1                    | CTTTGAAAAGAACTGG <b><u>TCCTCTTTTGAGGAACAAGTTTCTTGT</u></b> CTCATTATTTAATAAA |
| rec-5  | 2E                        | ACGAACTAGCGTCCAATACTGCGGAATGCTTT                                            |
| rec-6  | 2F                        | AAACAGTTGATGGCTTAGAGCTTATTTAAATA                                            |
| rec-7  | 2G                        | TGCAACTAAGCAATAAAGCCTCAGTTATGACC                                            |
| rec-8  | 2H                        | CTGTAATATTGCCTGAGAGTCTGGAAGAACTAG                                           |
| rec-9  | 2I                        | CATGTCAAGATTCTCCGTGGGAACCGTTGGTG                                            |
| rec-10 | 2J                        | TAGATGGGGGTAACGCCAGGGTGTGCCAAG                                              |
| rec-11 | 2K                        | CTTGCATGCATTAATGAATCGGCCGCCAGGG                                             |
| rec-12 | 2L                        | TGGTTTTTAACGTCAAAGGGCGAAGAACCATC                                            |
| rec-13 | 3A                        | AAAGGCCGAAAGGAACAATAAGCTTTCCAG                                              |
| rec-14 | 3B-I-1                    | GCTCCATGAGAGGCTT <b><u>TCCTCTTTTGAGGAACAAGTTTCTTGT</u></b> TGAGGACTAGGGAGTT |
| rec-15 | 3C-I-1                    | CGATTTTAGAGGACAG <b><u>TCCTCTTTTGAGGAACAAGTTTCTTGT</u></b> ATGAACGGCGCGACCT |
| rec-16 | 3D                        | ACTGGATAACGGAACAACATTATTACCTTATG                                            |
| rec-17 | 3E                        | TTTTTGCGCAGAAAACGAGAATGAATGTTTAG                                            |
| rec-18 | 3F                        | CAAAATTAAAGTACGGTGTCTGGAAGAGGTCA                                            |
| rec-19 | 3G                        | TCAGGTCACTTTTGCGGGAGAAGCAGAATTAG                                            |
| rec-20 | 3H                        | ACCCGTCGTCATATGTACCCCGGTAAAGGCTA                                            |
| rec-21 | 3I                        | ATTAAGTTCGCATCGTAACCGTGCAGTAACA                                             |
| rec-22 | 3J                        | GCCAGCTGCCTGCAGGTCGACTCTGCAAGGCG                                            |
| rec-23 | 3K                        | TGGACTCCCTTTTCACCACTGAGACCTGTCTGT                                           |
| rec-24 | 3L                        | ACCCAAATCAAGTTTTTTGGGGTCAAAGAACG                                            |
| rec-25 | 4A                        | CGTAACGATCTAAAGTTTTGTCTGTAATTGCG                                            |
| rec-26 | 4B                        | AATAATAAGGTCGCTGAGGCTTGCAAAGACTT                                            |
| rec-27 | 4C-I-1                    | TTTCATGAAAATTGTG <b><u>TCCTCTTTTGAGGAACAAGTTTCTTGT</u></b> TCGAAATCTGTACAGA |
| rec-28 | 4D-I-1                    | CCAGGCGCTTAATCAT <b><u>TCCTCTTTTGAGGAACAAGTTTCTTGT</u></b> TGTGAATTACAGGTAG |
| rec-29 | 4E                        | AAAGATTCAGGGGGTAATAGTAAACCATAAAT                                            |
| rec-30 | 4F                        | CAAAAATCATTGCTCCTTTTGATAAGTTTCAT                                            |
| rec-31 | 4G                        | TCCATATACATACAGGCAAGGCAACTTTATTT                                            |
| rec-32 | 4H                        | CAACGCAATTTTTGAGAGATCTACTGATAATC                                            |
| rec-33 | 4I                        | AGAAAAGCAACATTAAATGTGAGCATCTGCCA                                            |



|        |    |                                   |
|--------|----|-----------------------------------|
| rec-34 | 4J | GTTTGAGGGAAAGGGGGATGTGCTAGAGGATC  |
| rec-35 | 4K | CCCGGGTACTTTCCAGTCGGGAAACGGGCAAC  |
| rec-36 | 4L | AGCTGATTACAAGAGTCCACTATTGAGGTGCC  |
| rec-37 | 5A | ATATATTCTTTTTTCACGTTGAAAATAGTTAG  |
| rec-38 | 5B | CGCCTGATGGAAGTTCCATTAAACATAACCG   |
| rec-39 | 5C | TTTCAACTATAGGCTGGCTGACCTTGTATCAT  |
| rec-40 | 5D | TTTGCCAGATCAGTTGAGATTTAGTGGTTTAA  |
| rec-41 | 5E | TACCTTTAAGGTCTTACCCTGACAAAGAAGT   |
| rec-42 | 5F | CAATAAATACAGTTGATTCCCAATTTAGAGAG  |
| rec-43 | 5G | GGTAGCTAGGATAAAAATTTTAGTTAACATC   |
| rec-44 | 5H | CTTTCATCCCCAAAAACAGGAAGACCGGAGAG  |
| rec-45 | 5I | CAGCTGGCGGACGACGACAGTATCGTAGCCAG  |
| rec-46 | 5J | ACTGCCCGCCGAGCTCGAATTCGTTATTACGC  |
| rec-47 | 5K | AGTTTGGAGCCCTTCACCGCCTGGTTGCGCTC  |
| rec-48 | 5L | GTAAAGCACTAAATCGGAACCCTAGTTGTTCC  |
| rec-49 | 6A | TGTAGCATTCCACAGACAGCCCTCATCTCAA   |
| rec-50 | 6B | AAAAAAGGACAACCATCGCCACGCGGTAAA    |
| rec-51 | 6C | ATACGTAAAAGTACAACGGAGATTTTCATCAAG |
| rec-52 | 6D | AGTAATCTTAAATTGGGCTTGAGAGAATACCA  |
| rec-53 | 6E | CATTCAACGCGAGAGGCTTTTGCATATTATAG  |
| rec-54 | 6F | TCAGAAGCCTCCAACAGGTCAGGATCTGCGAA  |
| rec-55 | 6G | CGAGTAGAACTAATAGTAGTACAAACCCTCA   |
| rec-56 | 6H | TATATTTTAGCTGATAAATTAATGTTGTATAA  |
| rec-57 | 6I | GCAAAATATCGCGTCTGGCCTTCCTGGCCTCAG |
| rec-58 | 6J | GAAGATCGGTGCGGGCCTCTTCGCAATCATGG  |
| rec-59 | 6K | TCATAGCTACTCACATTAATTGCGCCCTGAGA  |
| rec-60 | 6L | GAGTTGCACGAGATAGGGTTGAGTAAGGGAGC  |
| rec-61 | 7A | CAATGACACTCCAAAAGGAGCCTTACAACGCC  |
| rec-62 | 7B | GCGAAACATGCCACTACGAAGGCATGCGCCGA  |
| rec-63 | 7C | ACGAGTAGTGACAAGAACCGGATATACCAAGC  |
| rec-64 | 7D | CCAAAATATAATGCAGATACATAAACACCAGA  |
| rec-65 | 7E | GAAGCAAAAAAGCGGATTGCATCAGATAAAAA  |
| rec-66 | 7F | TCAATTCTTTTAGTTTGACCATTACCAGACCG  |
| rec-67 | 7G | ACCGTTCTAAATGCAATGCCTGAGAGGTGGCA  |
| rec-68 | 7H | AAATAATTTTAAATTGTAAACGTTGATATTCA  |

|         |             |                                  |
|---------|-------------|----------------------------------|
| rec-69  | 7I          | GGCGATCGCACTCCAGCCAGCTTTGCCATCAA |
| rec-70  | 7J          | GTGAGCTAGTTTCCTGTGTGAAATTTGGGAAG |
| rec-71  | 7K          | GAATAGCCGCAAGCGGTCCACGCTCCTAATGA |
| rec-72  | 7L          | CCCCGATTTAGAGCTTGACGGGGAAATCAAAA |
| rec-73  | 8A          | TGAGTTTCGTACCAGTACAACTTAATTGTA   |
| rec-74  | 8B          | TCGGTTTAGCTTGATACCGATAGTCCAACCTA |
| rec-75  | 8C          | AAACGAAATGACCCCAGCGATTATTCATTAC  |
| rec-76  | 8D          | CCAAATCACTTGCCCTGACGAGAACGCCAAAA |
| rec-77  | 8E          | GGAATTACTCGTTTACCAGACGACAAAAGATT |
| rec-78  | 8F          | AAGAGGAACGAGCTTCAAAGCGAAGATACATT |
| rec-79  | 8G          | TCGCAAATGGGGCGCGAGCTGAAATAATGTGT |
| rec-80  | 8H          | AGGTAAAGAAATCACCATCAATATAATATTTT |
| rec-81  | 8I          | GTTAAATTTTAACCAATAGGAACCCGGCACC  |
| rec-82  | 8J          | GCTTCTGGTCAGGCTGCGCAACTGTGTTATCC |
| rec-83  | 8K          | GCTCACAATGTAAAGCCTGGGGTGGGTTTGCC |
| rec-84  | 8L          | CCAGCAGGGGCAAAATCCCTTATAAAGCCGGC |
| rec-85  | 9A-connect  | CTTAAACATCAGCTTGCTTTCGAGAAACAGTT |
| rec-86  | 9B-connect  | CTCATCTTGAGGCAAAAGAATACACTCCCTCA |
| rec-87  | 9C-connect  | GAATAAGGACGTAACAAAGCTGCTGACGGAAA |
| rec-88  | 9D-connect  | CATAACCCGAGGCATAGTAAGAGCTTTTAAAG |
| rec-89  | 9E-connect  | TTTAAATTGCCCGAAAGACTTCAATTCCAGAG |
| rec-90  | 9F-connect  | TTTCATTTGGTCAATAACCTGTTTAATCAATA |
| rec-91  | 9G-connect  | AGACAGTCATTCAAAGGGTGAGATATCATAT  |
| rec-92  | 9H-connect  | GCTCATTTTCGCATTAAATTTTGTAGCTTAGA |
| rec-93  | 9I-connect  | TTCGCCATTGCCGAAACCAGGCAACAGTAC   |
| rec-94  | 9J-connect  | GCATAAAGTTCACACAACATACGAAACAATT  |
| rec-95  | 9K-connect  | CCGAAATCCGAAATCCTGTTTGAAATACCGA  |
| rec-96  | 9L-connect  | GAACGTGGCGAGAAAGGAAGGGAACAACTAT  |
| rec-97  | 10A-connect | CAAGCCCAATAGGAACCCATGTACCGTAACAC |
| rec-98  | 10B-connect | AATGCCCCGTAACAGTGCCCGTATGTGAATTT |
| rec-99  | 10C-connect | GAGCCGCCCCACCACCGGAACCGCTAAAACA  |
| rec-100 | 10D-connect | TTATTCATAGGGAAGGTAAATATTCATTAGT  |
| rec-101 | 10E-connect | AAAAGTAATATCTTACCGAAGCCCAACACTAT |
| rec-102 | 10F-connect | CCTAATTTACGCTAACGAGCGTCTATATCGCG |
| rec-103 | 10G-connect | ATCGGCTGCGAGCATGTAGAAACAGCTATAT  |

|         |             |                                   |
|---------|-------------|-----------------------------------|
| rec-104 | 10H-connect | GCGTTATAGAAAAAGCCTGTTTAGAAGGCCGG  |
| rec-105 | 10I-connect | TTAAGACGTTGAAAACATAGCGATTAAATCA   |
| rec-106 | 10J-connect | CTTTTACACAGATGAATATACAGTAAGCGCCA  |
| rec-107 | 10K-connect | CGACAACCTAAGTATTAGACTTTACAGCCGGAA |
| rec-108 | 10L-connect | ACGAACCAAAACATCGCCATTAAATGGTGGTT  |
| rec-109 | 11A         | TGCCTTGACTGCCTATTTTCGGAACAGGATAG  |
| rec-110 | 11B         | AACCAGAGACCCTCAGAACCGCCAGGGTCAG   |
| rec-111 | 11C         | ATTGAGGGTAAAGGTGAATTATCAATCACCGG  |
| rec-112 | 11D         | GCAATAGCGCAGATAGCCGAACAATTCAACCG  |
| rec-113 | 11E         | TCTTACCAGCCAGTTACAAAATAAATGAAATA  |
| rec-114 | 11F         | CTAATTTATCTTTCCTTATCATTCATCTGAA   |
| rec-115 | 11G         | AATTACTACAAATCTTACCAGTAATCCCATC   |
| rec-116 | 11H         | TAGAATCCCTGAGAAGAGTCAATAGGAATCAT  |
| rec-117 | 11I         | TTTAACGTTCCGGGAGAAACAATAATTTCCCT  |
| rec-118 | 11J         | GGATTTAGCGTATTAAATCCTTTGTTTTCAGG  |
| rec-119 | 11K         | TAGCCCTACCAGCAGAAGATAAAAACATTTGA  |
| rec-120 | 11L         | CGGCCTTGCTGGTAATATCCAGAACGAACTGA  |
| rec-121 | 12A         | CTCAGAGCCACCACCCTCATTTTCCTATTATT  |
| rec-122 | 12B         | CTGAAACAGGTAATAAGTTTAAACCCCTCAGA  |
| rec-123 | 12C         | GCCACCACTCTTTTCATAATCAAACCGTCACC  |
| rec-124 | 12D         | GACTTGAGAGACAAAAGGCGACAAGTTACCA   |
| rec-125 | 12E         | GAAGGAAAATAAGAGCAAGAAACACAGCCAT   |
| rec-126 | 12F         | ATTATTTAACCAGCTACAATTTTCAAGAACG   |
| rec-127 | 12G         | GGTATTAAGAACAAGAAAAATAATTAAAGCCA  |
| rec-128 | 12H         | ACGCTCAAAATAAGAATAAACACCGTGAATTT  |
| rec-129 | 12I         | ATCAAAATCGTCGCTATTAATTAACGGATTCTG |
| rec-130 | 12J         | CCTGATTGAAAGAAATTGCGTAGACCCGAACG  |
| rec-131 | 12K         | TTATTAATGCCGTCAATAGATAATCAGAGGTG  |
| rec-132 | 12L         | AGGCGGTCATTAGTCTTTAATGCGCAATATTA  |
| rec-133 | 13A         | AGTGTACTTGAAAGTATTAAGAGGCCGCCACC  |
| rec-134 | 13B         | GTTTGCCACCTCAGAGCCGCCACCGATACAGG  |
| rec-135 | 13C         | AGCGCCAACCATTGGGAATTAGATTATTAGC   |
| rec-136 | 13D         | GCCCAATACCGAGGAAACGCAATAGGTTTACC  |
| rec-137 | 13E         | TATTTTGCTCCCAATCAAATAAGTGAGTTAA   |
| rec-138 | 13F         | TAAGTCCTACCAAGTACCGCACTCTTAGTTGC  |

|         |     |                                   |
|---------|-----|-----------------------------------|
| rec-139 | 13G | AGGCGTTACAGTAGGGCTTAATTGACAATAGA  |
| rec-140 | 13H | CTGTAAATCATAGGTCTGAGAGACGATAAATA  |
| rec-141 | 13I | ACAGAAATCTTTGAATACCAAGTTCCTTGCTT  |
| rec-142 | 13J | AGATTAGATTTAAAAGTTTGAGTACACGTAAA  |
| rec-143 | 13K | GAATGGCTAGTATTAAACCCGCCTCAACTAAT  |
| rec-144 | 13L | CCGCCAGCCATTGCAACAGGAAAAATATTTT   |
| rec-145 | 14A | CCCTCAGAACCGCCACCTCAGAACTGAGACT   |
| rec-146 | 14B | CCTCAAGAATACATGGCTTTTGATAGAACCAC  |
| rec-147 | 14C | CACCAGAGTTCGGTCATAGCCCCGCCAGCAA   |
| rec-148 | 14D | AATCACCAAATAGAAAATTCATATATAACGGA  |
| rec-149 | 14E | ATACCCAAGATAACCCACAAGAATAAACGATT  |
| rec-150 | 14F | TTTGTGTTAAGCCTTAAATCAAGAATCGAGAA  |
| rec-151 | 14G | CAAGCAAGACGCGCCTGTTTATCAAGAATCGC  |
| rec-152 | 14H | CATATTTAGAAATACCGACCGTGTTACCTTTT  |
| rec-153 | 14I | TAACCTCCATATGTGAGTGAATAAACAAAATC  |
| rec-154 | 14J | GCGCAGAGATATCAAAATTATTTGACATTATC  |
| rec-155 | 14K | ATTTTGCGTCTTTTAGGAGCACTAAGCAACAGT |
| rec-156 | 14L | GCCACGCTATACGTGGCACAGACAACGCTCAT  |
| rec-157 | 15A | TAAGCGTCGAAGGATTAGGATTAGTACCGCCA  |
| rec-158 | 15B | TCGGCATTCCGCCGCCAGCATTGACGTTCCAG  |
| rec-159 | 15C | TCACAATCGTAGCACCATTACCATCGTTTTCA  |
| rec-160 | 15D | ATCAGAGAAAGAACTGGCATGATTTTATTTTG  |
| rec-161 | 15E | AGGTTTGAACGTCAAAAATGAAAGCGCTAAT   |
| rec-162 | 15F | AATGCAGACCGTTTTTATTTTCATCTTGCGGG  |
| rec-163 | 15G | AATGGTTTACAACGCCAACATGTAGTTCAGCT  |
| rec-164 | 15H | AAATCAATGGCTTAGGTTGGGTTACTAAATTT  |
| rec-165 | 15I | AACCTACCGCGAATTATTCATTTCCAGTACAT  |
| rec-166 | 15J | CTAAAATAGAACAAAGAAACCACGAGGTAG    |
| rec-167 | 15K | GCGTAAGAGAGAGCCAGCAGCAAAAAGGTTAT  |
| rec-168 | 15L | GGAAATACCTACATTTTGACGCTCACCTGAAA  |
| rec-169 | 16A | TATCACCGTACTCAGGAGGTTTAGCGGGGTTT  |
| rec-170 | 16B | TGCTCAGTCAGTCTCTGAATTTACCAGGAGGT  |
| rec-171 | 16C | TGAGGCAGGCGTCAGACTGTAGCGTAGCAAGG  |
| rec-172 | 16D | CCGGAAACACACCACGGAATAAGTAAGACTCC  |
| rec-173 | 16E | TTATTACGGTCAGAGGGTAATTGAATAGCAGC  |

|         |        |                                   |
|---------|--------|-----------------------------------|
| rec-174 | 16F    | CTTTACAGTTAGCGAACCTCCCGACGTAGGAA  |
| rec-175 | 16G    | TCATTACCCGACAATAAACACATATTTAGGC   |
| rec-176 | 16H    | AGAGGCATAATTTTCATCTTCTGACTATAACTA |
| rec-177 | 16I    | TATGTAAACCTTTTTTAATGGAAAAATTACCT  |
| rec-178 | 16J    | GAGCAAAACTTCTGAATAATGGAAGAAGGAG   |
| rec-179 | 16K    | CGGAATTATTGAAAGGAATTGAGGTGAAAAAT  |
| rec-180 | 16L    | CTAAAGCAAGATAGAACCTTCTGAATCGTCT   |
| rec-181 | 17A    | GGAAAGCGACCAGGCGGATAAGTGAATAGGTG  |
| rec-182 | 17B    | TGCCTTTAGTCAGACGATTGGCCTGCCAGAAT  |
| rec-183 | 17C    | ACGCAAAGGTCACCAATGAAACCAATCAAGTT  |
| rec-184 | 17D    | TGAACAAACAGTATGTTAGCAAATAAAAGAA   |
| rec-185 | 17E    | GAGGCGTTAGAGAATAACATAAAAGAACACCC  |
| rec-186 | 17F    | CCAGACGAGCGCCCAATAGCAAGCAAGAACGC  |
| rec-187 | 17G    | TTTGTAGTTTTTCGAGCCAGTAATAAATTCTGT |
| rec-188 | 17H    | TTGAATTATGCTGATGCAAATCCACAAATATA  |
| rec-189 | 17I    | TGGATTATGAAGATGATGAAACAAAATTCAT   |
| rec-190 | 17J    | ATCAACAGTCATCATATTCTGATTGATTGTT   |
| rec-191 | 17K    | GCCAACAGTCACCTTGCTGAACCTGTTGGCAA  |
| rec-192 | 17L    | GAAATGGATTATTACATTGGCAGACATTCTG   |
| rec-193 | 910M1  | AACATCACTTGCCCTGAGTAGAAGAACT      |
| rec-194 | 910M2  | TGTAGCAATACTTCTTTGATTAGTAAT       |
| rec-195 | 910M3  | AGTCTGTCCATCACGCAAATTAACCGT       |
| rec-196 | 910M4  | ATAATCAGTGAGGCCACCGAGTAAAG        |
| rec-197 | 910M5  | ACGCCAGAATCCTGAGAAGTGTTTTT        |
| rec-198 | 910M6  | TTAAAGGGATTTTAGACAGGAACGGT        |
| rec-199 | 910M7  | AGAGCGGGAGCTAAACAGGAGGCCGA        |
| rec-200 | 910M8  | TATAACGTGCTTTCCTCGTTAGAATC        |
| rec-201 | 910M9  | GTACTATGGTTGCTTTGACGAGCACG        |
| rec-202 | 910M10 | GCGCTTAATGCGCCGCTACAGGGCGC        |

**Table S2** Nucleotide sequences for the staple strands with comp-ODN

|         | Position<br>(see Fig.S1a) | Sequence (from 5' to 3')                                      |
|---------|---------------------------|---------------------------------------------------------------|
| rec-203 | 11B-comp-ODN1             | <u>TTCGCTGAAGAGCCGAATCC</u> AACCAGAGACCCTCAGAACC GCCAGGGGTCAG |
| rec-204 | 11D-comp-ODN1             | <u>TTCGCTGAAGAGCCGAATCC</u> GCAATAGCGCAGATAGCCGAACAATTCAACCG  |
| rec-205 | 11F-comp-ODN1             | <u>TTCGCTGAAGAGCCGAATCC</u> CTAATTTATCTTTCCTTATCATTCATCCTGAA  |
| rec-206 | 11H-comp-ODN1             | <u>TTCGCTGAAGAGCCGAATCC</u> TAGAATCCCTGAGAAGAGTCAATAGGAATCAT  |
| rec-207 | 11J-comp-ODN1             | <u>TTCGCTGAAGAGCCGAATCC</u> GGATTTAGCGTATTAAATCCTTTGTTTTCAGG  |
| rec-208 | 14B-comp-ODN2             | <u>ACCACCACCACCACCACCAA</u> CCTCAAGAATACATGGCTTTTGATAGAACCAC  |
| rec-209 | 14D-comp-ODN2             | <u>ACCACCACCACCACCACCAA</u> AATCACCAAATAGAAAATTCATATATAACGGA  |
| rec-210 | 14F-comp-ODN2             | <u>ACCACCACCACCACCACCAA</u> TTTTGTTTAAGCCTTAAATCAAGAATCGAGAA  |
| rec-211 | 14H-comp-ODN2             | <u>ACCACCACCACCACCACCAA</u> CATATTTAGAAATACCGACCGTGTACCTTTT   |
| rec-212 | 14J-comp-ODN2             | <u>ACCACCACCACCACCACCAA</u> GCGCAGAGATATCAAAATTATTTGACATTATC  |
| rec-213 | 6B-comp-ODN3              | <u>CATAGGCCGAAGCCTTATCC</u> AAAAAAGGACAACCATCGCCACGCGGGTAAA   |
| rec-214 | 6D-comp-ODN3              | <u>CATAGGCCGAAGCCTTATCC</u> AGTAATCTTAAATTGGGCTTGAGAGAATACCA  |
| rec-215 | 6F-comp-ODN3              | <u>CATAGGCCGAAGCCTTATCC</u> TCAGAAGCCTCCAACAGGTGAGGATCTGCGAA  |
| rec-216 | 6H-comp-ODN3              | <u>CATAGGCCGAAGCCTTATCC</u> TATATTTTAGCTGATAAATTAATGTTGTATAA  |
| rec-217 | 6J-comp-ODN3              | <u>CATAGGCCGAAGCCTTATCC</u> GAAGATCGGTGCGGGCCTCTTCGCAATCATGG  |

## Reference for supporting information

- S1. P. W. K. Rothmund, Folding DNA to create nanoscale shapes and patterns. *Nature*, 2006, **440**, 297.
- S2. Ogawa M.; Kosaka N.; Choyke P.L.; Kobayashi H. H-type dimer formation of fluorophores: a mechanism for activatable, in vivo optical molecular imaging. *ACS Chem Biol.* **2009**, *4*, 535.
- S3. Valdes-Aguilera, O.; Neckers, D. C. Aggregation phenomena in xanthene dyes. *Acc. Chem. Res.* **1989**, *22*, 171.
- S4. Selwyn, J. E.; Steinfeld, J. I. Aggregation of equilibriums of xanthene dyes. *J. Phys. Chem.* **1972**, *76*, 762.
